# Supplementary material for: Improved strategies for selection and characterization of new monoclonal anti-carbamazepine antibodies during the screening process using feces and fluorescence polarization immunoassay
Source: Royal Society of Chemistry journal article supplement (doi:10.1039/c6ay01968d), 2016-01-01
Supplement: c6ay01968d1.pdf [file c6ay01968d1.pdf]

## Electronic Supplementary Information

### Analytical Methods

#### Improved strategies for selection and characterization of new monoclonal anti-carbamazepine antibodies during the screening process using feces and fluorescence polarization immunoassay

Lidia Oberleitner,<sup>a,b</sup> Ursula Dahmen-Levison,<sup>c</sup> Leif-Alexander Garbe,<sup>b</sup> Rudolf J. Schneider<sup>a\*</sup>

<sup>a</sup> Bundesanstalt für Materialforschung und –prüfung (BAM), 12205 Berlin, Germany

<sup>b</sup> Institute of Bioanalytics, Department of Biotechnology, Technische Universität Berlin, 13353 Berlin, Germany

<sup>c</sup> aokin AG, Robert-Rössle-Str. 10, 13125 Berlin, Germany

\* Corresponding author: E-mail: rudolf.schneider@bam.de; Tel: +49 30 8104 1151

Fax: +49 30 8104 71151

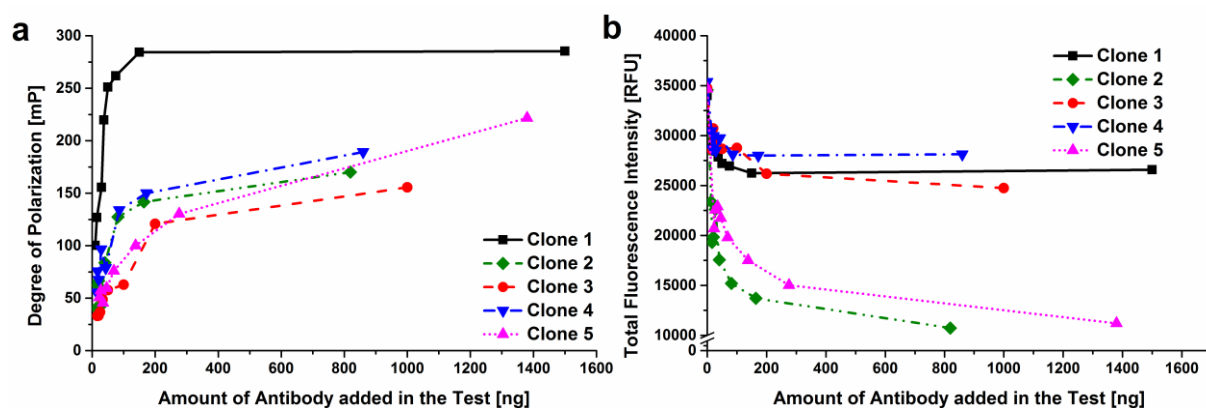

Fig. S1: Degrees of polarization (a) and total fluorescence intensities (b) were measured with FPIA depending on the amount of the different purified antibodies added in CBZ FPIA (clone 1-5).

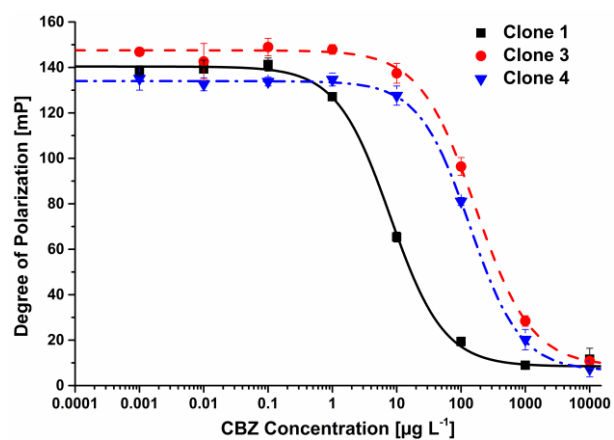

Fig. S2: CBZ FPIA calibration curves for purified antibodies from clone 1, 3 and 4 measured on MTPs after 10 min incubation time (measurements for each calibration point were performed in triplicate).
